# Supplementary material for: NADPH oxidase-mediated redox signaling promotes oxidative stress resistance and longevity through memo-1 in C. elegans
Source: eLife journal article supplement (doi:10.7554/elife.19493), 2017-01-13
Supplement: figures [file elife-19493-figures-v2.pdf]

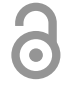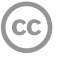

---

## Figures and figure supplements

NADPH oxidase-mediated redox signaling promotes oxidative stress resistance and longevity through *memo-1* in *C. elegans*

**Collin Yvès Ewald et al**

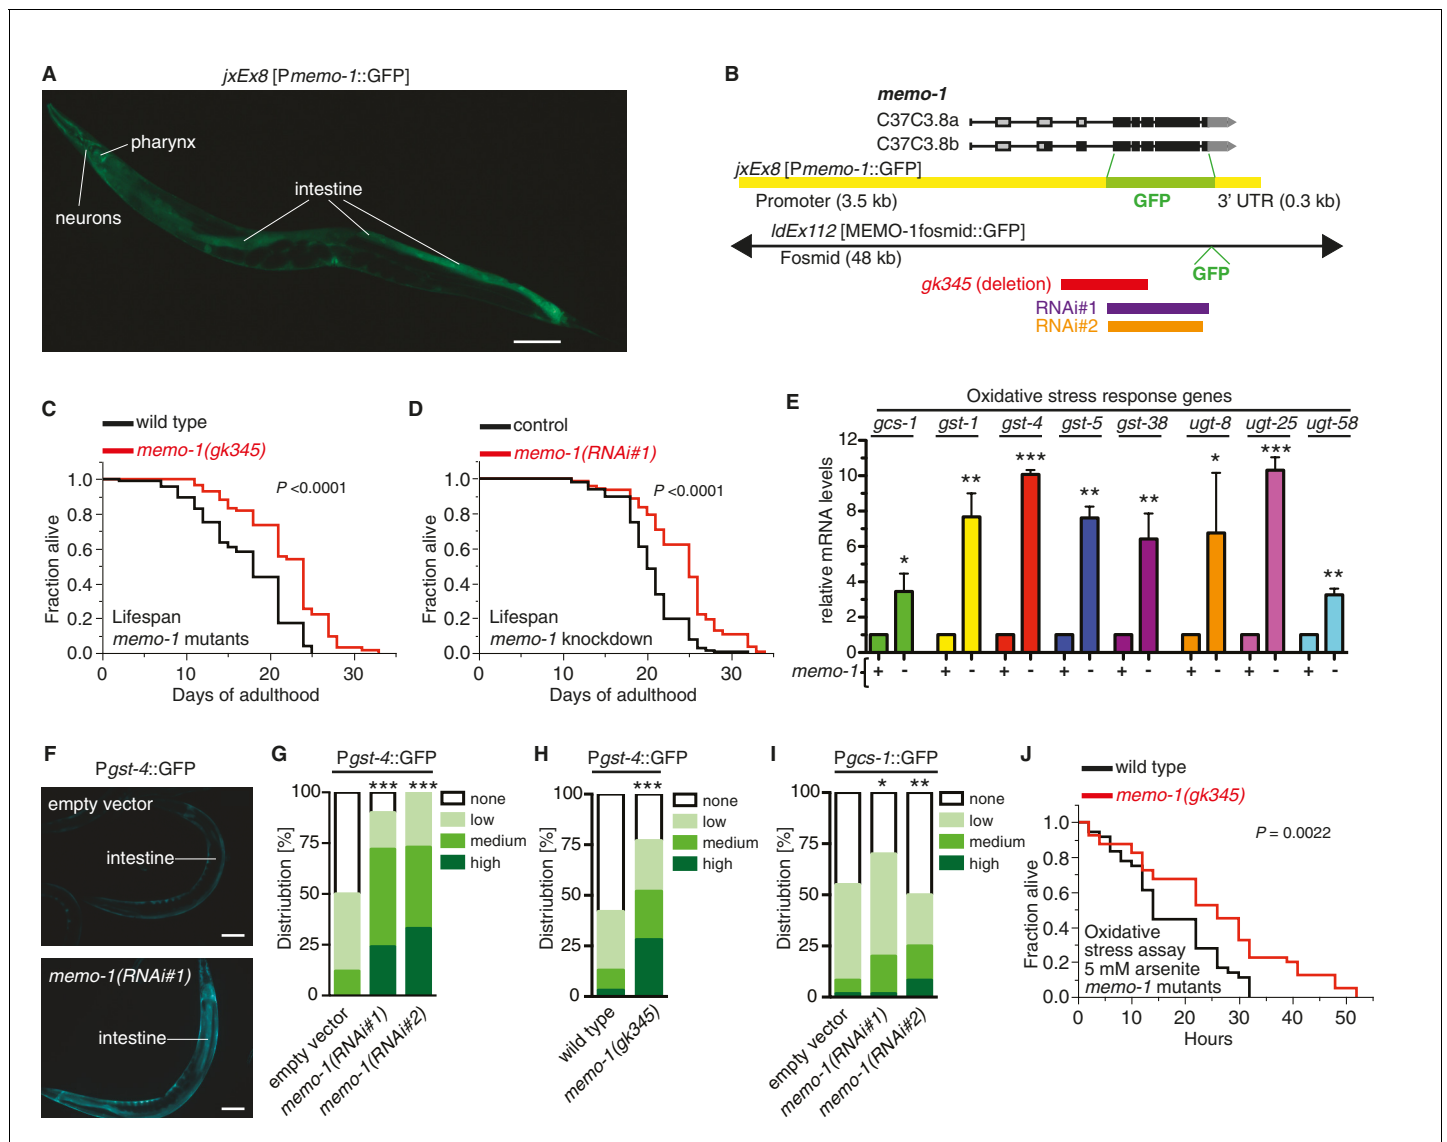

**Figure 1.** Loss of *memo-1* leads to increased ROS. (A) Transcriptional fusion of the *memo-1* promoter (*P<sub>memo-1</sub>*) with GFP (*jxEx8 [P<sub>memo-1</sub>::GFP]*) shows that *memo-1* is expressed in neurons, pharyngeal cells, and intestine in adult *C. elegans*. Anterior to the left, ventral side down. Scale bar = 100  $\mu$ m. (B) Genomic organization of the *C37C3.8 (memo-1)* locus (gray is untranslated UTR; black are translated exons; adapted from wormbase.org). The *memo-1* gene encodes two isoforms (*C37C3.8a* and *C37C3.8b*), whereby *C37C3.8b* is predicted to be 48 amino acids longer than *C37C3.8a* (297 amino acids). The *gk345* allele (red) is a 915 bp deletion. RNAi#1 clone (purple) and RNAi#2 clone (orange) are from Vidal- and Ahninger RNAi libraries, respectively. See Materials and methods for more details. (C) *memo-1(gk345)* mutants show a 27% increase in mean lifespan compared to wild type (N2) at 20°C. *P* value determined by log-rank. Statistics and additional lifespan data are in **Supplementary file 1**. (D) Knockdown of *memo-1(RNAi#1)* starting on the first day of adulthood in RNAi-sensitive animals (*rrf-3(pk1426)*) increases mean lifespan by 20% compared to empty RNAi vector control (L4440) at 20°C. *P* value determined by log-rank. Statistics and additional lifespan data are in **Supplementary file 1**. (E) *memo-1(RNAi#2)* treated wild type (N2) (-) have higher mRNA expression levels of the oxidative stress response genes, such as glutamine cysteine synthetase (*gcs-1*), glutathione-S-transferase (*gst-1*, 4, 5, 38), and uridine 5'-diphospho-glucuronosyltransferase (*ugt-8*, 25, 58), compared to empty vector treated wild type (N2) (+), determined by qRT-PCR. 3 replicates of >1000 mixed staged worms per condition were analysed. Data are represented as mean  $\pm$  s.e.m. *P* value \* <0.05, \*\* <0.001, \*\*\* <0.0001 relative to wild type or control, by one sample t-test, two-tailed, hypothetical mean of 1. (F–I) Loss of *memo-1* increases the expression of oxidative stress response genes *gst-4* and *gcs-1* in the intestine. (F) shows representative pictures of *dvl519 [P<sub>gst-4</sub>::GFP]* transgenic adult *C. elegans* treated with empty vector (upper picture; category: none) or *memo-1(RNAi#1)* (lower picture; category: high). Anterior to the right, ventral side up. Scale bar = 100  $\mu$ m. (G–I) Quantification of transgenic worms containing the promoter of *gst-4* or *gcs-1* fused with GFP (*dvl519 [P<sub>gst-4</sub>::GFP]* and *IdIs003 [P<sub>gcs-1</sub>::GFP]*). Scoring is described in Material and methods. Three trials are shown with *N* > 60 for each condition and trial. *P* value by  $\chi^2$  (\* <0.05; \*\* <0.001; \*\*\* <0.0001). (J) Survival of one-day old adult *memo-1(gk345)* mutants or wild type (N2) in sodium arsenite (5 mM) was assayed. *P* value determined by log-rank. Statistics and additional oxidative stress data either with arsenite or *tert*-butyl hydrogen peroxide are shown in **Supplementary file 2**.

Figure 1 continued on next page

Figure 1 continued

DOI: [10.7554/eLife.19493.002](https://doi.org/10.7554/eLife.19493.002)

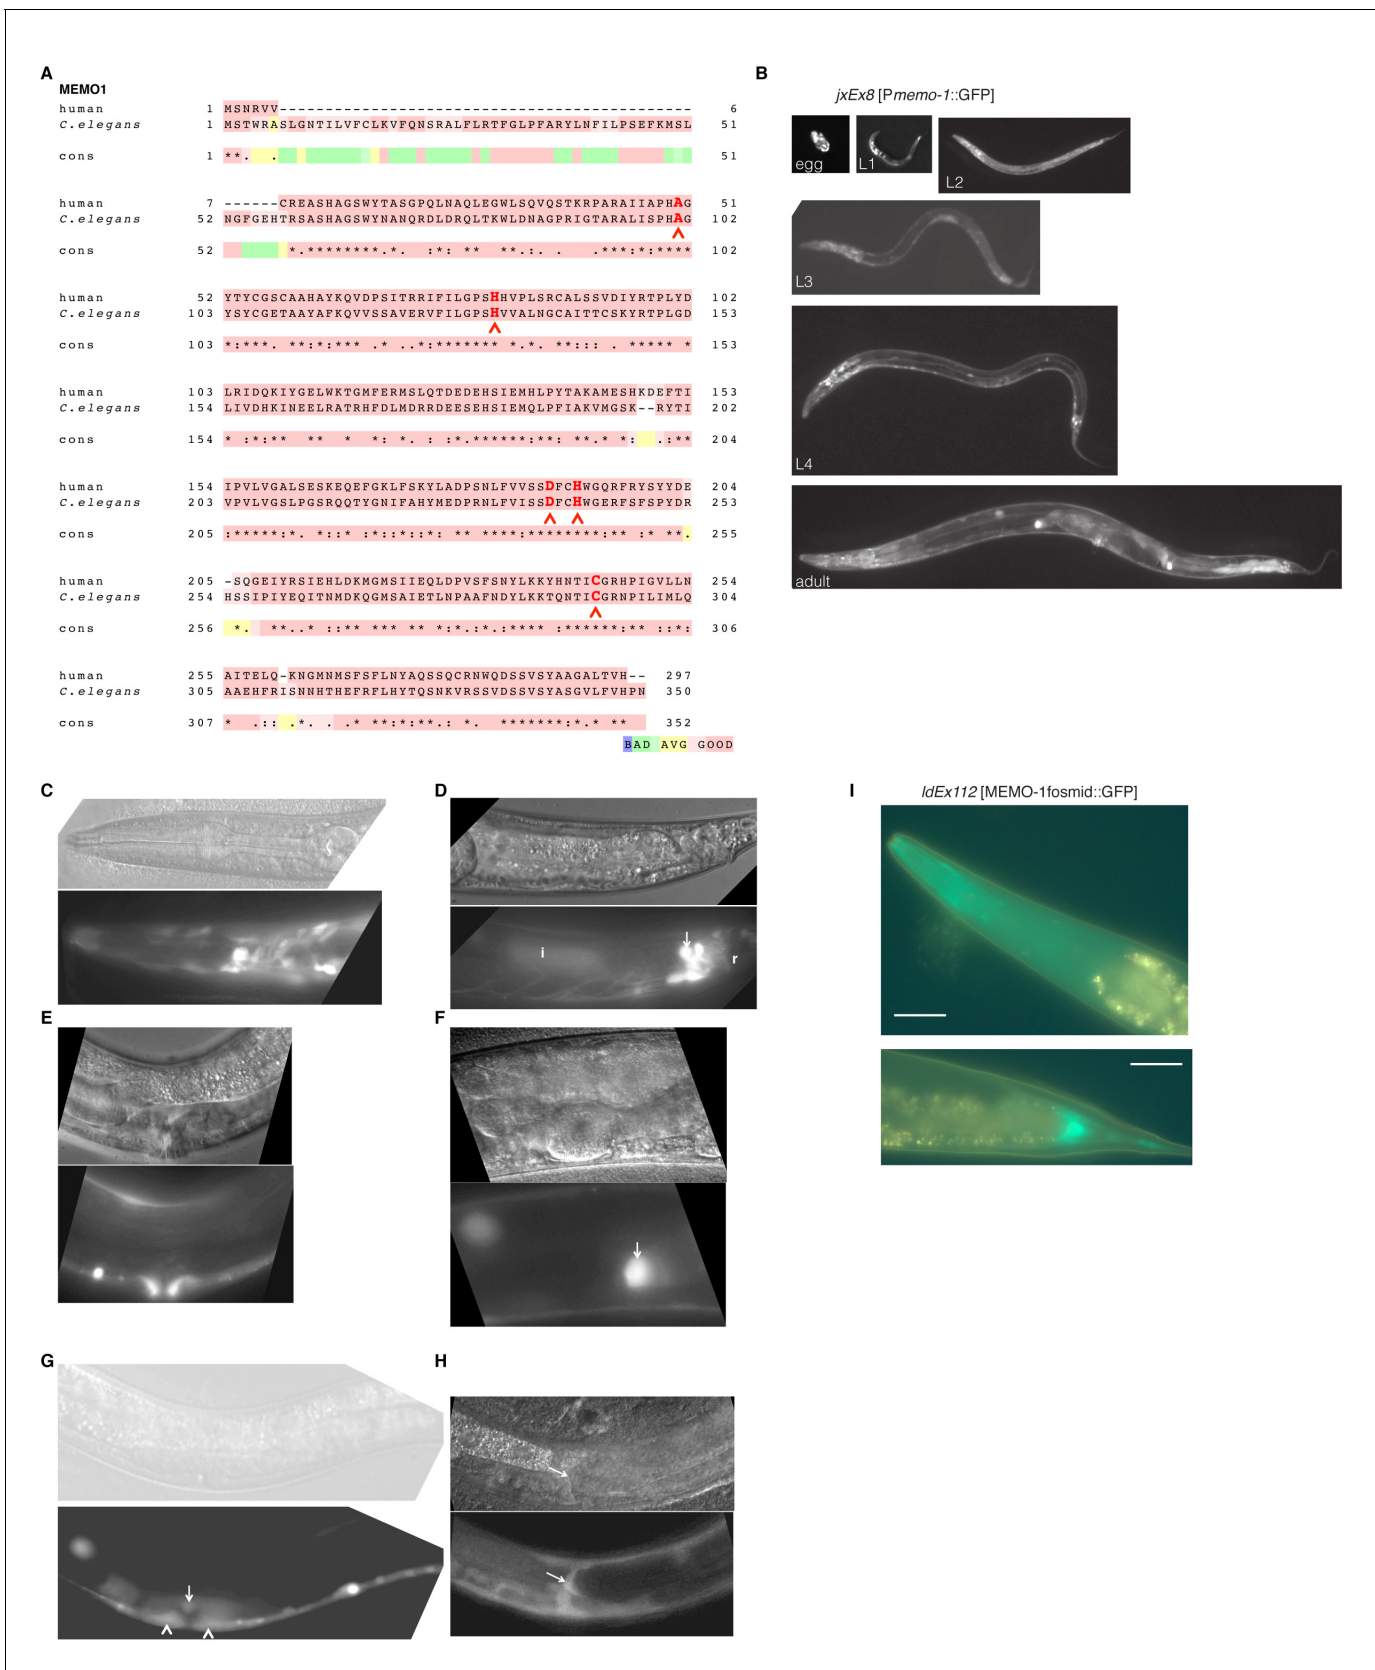

**Figure 1—figure supplement 1.** MEMO-1 is a conserved protein that is expressed in many tissues in *C. elegans*. (A) Alignment of human Memo1 with *C. elegans* MEMO-1 amino acid sequence shows high conservation. Human Memo1 Isoform 1 (297 amino acids; Q9Y316 uniprot.org) was aligned with *C. elegans* MEMO-1 (352 amino acids; Q9Y316 uniprot.org). The alignment is shown in the top panel, with the human sequence in red and the *C. elegans* sequence in black. The conservation score is shown in the bottom panel, with colors indicating the degree of conservation: blue (BAD), green (AVG), and red (GOOD). (B) Fluorescence microscopy images of *C. elegans* expressing GFP under the *Pmemo-1* promoter at various developmental stages: egg, L1, L2, L3, L4, and adult. (C–H) Fluorescence microscopy images of *C. elegans* expressing GFP under the *Pmemo-1* promoter in different tissues: head (C), head (D), head (E), head (F), head (G), and head (H). (I) Fluorescence microscopy image of *C. elegans* expressing GFP under the *IdEx112* promoter, which drives expression of MEMO-1 from its endogenous promoter. Scale bar = 10 μm.

## Figure 1—figure supplement 1 continued

*C. elegans* *memo-1* isoform b (350 amino acids; wormbase.org). 153 out of 297 amino acids (52%) are identical between human and *C. elegans*. Stars indicate identical amino acids, single dots indicate that size or hydrophobicity is conserved, and double dots indicate that both size and hydrophobicity are conserved between the corresponding residues. The amino acids that bind copper are conserved in *C. elegans* (H49, H81, D189, H192, C244 [MacDonald et al., 2014]) and are indicated with red chevrons. T-coffee was used for the alignment (Notredame et al., 2000). (B–H) *memo-1* is expressed in neuronal and non-neuronal cells throughout development and adulthood (B). Promoter *memo-1* driven green fluorescent protein (GFP) (*jxEx8* [*Pmemo-1::GFP*]) animals are shown. (C) *Pmemo-1::GFP* is expressed in some neurons in the head of an L4 wild-type worm, e.g., amphid neurons, including ASJ, and also non-neuronal tissues, such as the pharynx (the procorpus, the anterior bulb, the isthmus and the terminal bulb). (D) In young, adult wild-type worms, *Pmemo-1::GFP* is expressed in tail neurons, the posterior end of the intestine and the rectal area. Strong *Pmemo-1::GFP* expression in tail neurons (arrow) and weaker expression in the posterior end of the intestine (i) and the rectal area (r). (E) *Pmemo-1::GFP* is expressed in the adult vulva. (F) *Pmemo-1::GFP* is expressed in the spermatheca of wild-type adults. (G) *Pmemo-1::GFP* is expressed during vulva development at the L4 stage. In an early L4, *Pmemo-1::GFP::GFP* is expressed weakly around the vulva and expressed strongly in the anchor cell (arrow) and the vulval precursor cells (chevrons). There is also strong expression in the ventral cord neurons. Note that *Pmemo-1::GFP* is expressed in vulva precursor cells similar to EGFR expression (Haag et al., 2014). (H) *Pmemo-1::GFP* is expressed in the distal tip cells (arrow). For images (C–H): Top panel shows the Nomarski image and bottom panel the corresponding *Pmemo-1::GFP* expression. Anterior of the worm is to the left and the ventral side is down; the focus is on the middle plane at 100x magnification. (I) Translational fusion of MEMO-1 with GFP (*IdEx112* [MEMO-1fosmid::GFP]) is localized to head neurons and pharynx surrounding cells (head; upper picture) and intestinal cells (tail; bottom picture). Scale bar = 20  $\mu\text{m}$ .

DOI: [10.7554/eLife.19493.003](https://doi.org/10.7554/eLife.19493.003)

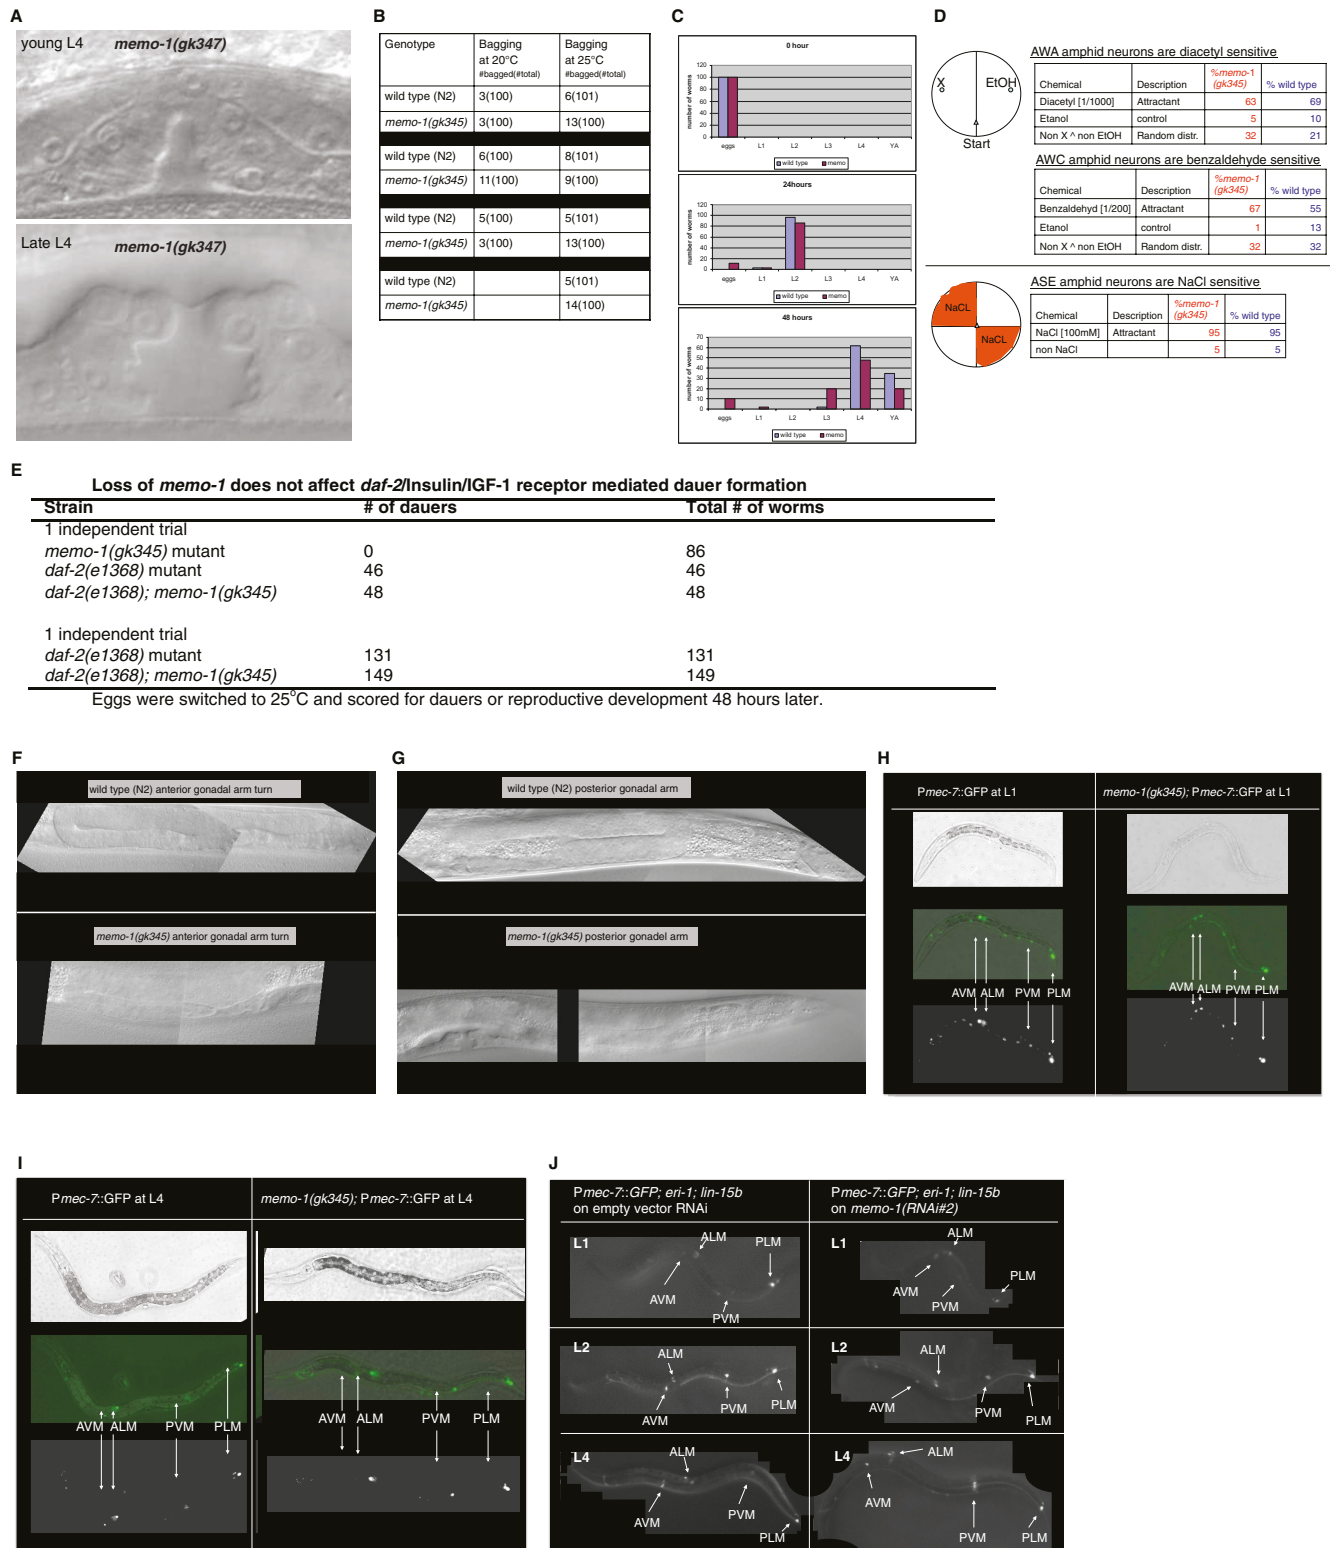

**Figure 1—figure supplement 2.** Reverse genetics approach to determine *memo-1* function. (A–B) EGFR phenotypes are not affected by *memo-1*. EGFR/*let-23* mutants fail to form a vulva (Ferguson and Horvitz, 1985) and as a result, EGFR mutants incarcerate their progeny resulting in bags of Figure 1—figure supplement 2 continued on next page

## Figure 1—figure supplement 2 continued

worms (bagging; [Ferguson and Horvitz, 1985]). The phenotype of the *let-23(n1045)* mutant has a weakly penetrant multiple vulva (Muv) phenotype at 25°C (Ferguson and Horvitz, 1985). We crossed hermaphrodites of *let-23(n1045)* that were raised at 20°C either to wild type (N2) or *memo-1(gk345)* and placed them at 25°C. Three days later, we analyzed the heterozygous progeny for the Muv phenotype at 25°C. The control, which is the heterozygous *let-23(n1045)/+; +/+* progeny, had a 27% Muv phenotype at 25°C, whereas the heterozygous *let-23(n1045)/+; memo-1(gk345)/+* progeny had a 14% Muv phenotype at 25°C. A t-test showed no significant difference between the two populations for their Muv phenotype (not shown). (A) Developing vulva of *memo-1(gk345)* mutants looks superficially wild type (wildtype vulva not shown). Top panel shows Normarski image of a young L4 vulva and bottom panel of a late L4 vulva of *memo-1(gk345)* mutants. (B) *memo-1(gk345)* mutants do not show increased incidences of bagging. (C) The development speed of *memo-1(gk345)* mutants is similar to wild type (N > 200; one representative trial out of 3 shown). (D) Top panel schematic: Chemotaxis on agar plates with the triangles indicating the start point for worms. 'X' indicates the pole where the compound used in the experiment is placed, and ethanol (EtOH) served as the negative control. 1 µl of sodium azide (NaN<sub>3</sub>) was added to both poles (green circles) to anesthetize the worms. Lower panel schematic: The agar plates were split into four quadrants. On the surface of the two opposite quadrants 100 mM sodium chloride was added. Tables display results. N > 200 per condition. No statistical difference in chemotaxis was seen between *memo-1(gk345)* and wild type determined by t-test, unpaired, two-tailed. (E) Loss of *memo-1* does not affect insulin/IGF-1 signaling-mediated dauer formation. (F–G) Loss of *memo-1* does not affect gonadal migration or morphology at 20°C. (F) Anterior gonadal arm of wild type (upper panel) and *memo-1(gk345)* mutant (lower panel) at the L4 stage are shown. (G) Posterior gonadal arm of wild type (upper panel) and *memo-1(gk345)* mutant (lower panel) at the L4 stage are shown. For F–G: anterior of the worm is to the left and the ventral side is down; the focus is on the middle plane at 100x magnification. (H–J) Loss of *memo-1* does not affect neuroblast migration. Q neuroblasts and their descendants undergo long-range migration. At the L1 stage the Q neuroblasts divide into QL and QR, which generate some sensory neurons (Sulston and Horvitz, 1977). Both QR and QL descendants start to migrate from the midbody, with the QR descendants migrating anteriorly and the QL descendants migrating posteriorly, where they divide further to give rise to two of the sensory touch receptor neurons (AVM and PVM) (Ch'ng et al., 2003). To test if *memo-1* is involved in this migration, we used RNAi to knock down *memo-1* or *memo-1(gk345)* mutants in transgenic *muls32 [Pmec-7::GFP]* animals that express GFP in the Q neuroblasts and their descendants (six touch neurons (ALML, ALMR, AVM, PLML, PLMR, and PVM); [Ch'ng et al., 2003]). (H–I) Representative transgenic *Pmec-7::GFP* animal either in wild-type background (left panel) or *memo-1(gk345)* mutant background (right panel) before migration of Q neuroblasts starts (G) at L1 and after migration (H) at L4. Loss of *memo-1* with *memo-1(gk345)* mutation revealed no deficiency in the migration of the AVM and PVM cells. (J) Representative images of transgenic *Pmec-7::GFP* animal in an *eri-1(mg366); lin-15b(n744)* mutant background treated either with empty vector RNAi (L4440; left panel) or *memo-1(RNAi#1 or #2)* (right panel; shown is *memo-1(RNAi#2)*). The *eri-1; lin-15b* double mutations renders the worm neurons more sensitive to feeding-induced RNAi (Kennedy et al., 2004). Knocking down *memo-1* with *memo-1(RNAi#1 or #2)* did not prevent the migration of the AVM and PVM cells. For all images: anterior of the worm is to the left and the ventral side is down; the focus is on the middle plane at 100x magnification. For (H–I) the same worm is shown per column: top picture is bright field, middle picture is merged GFP with bright field, and bottom picture is GFP channel.

DOI: 10.7554/eLife.19493.004

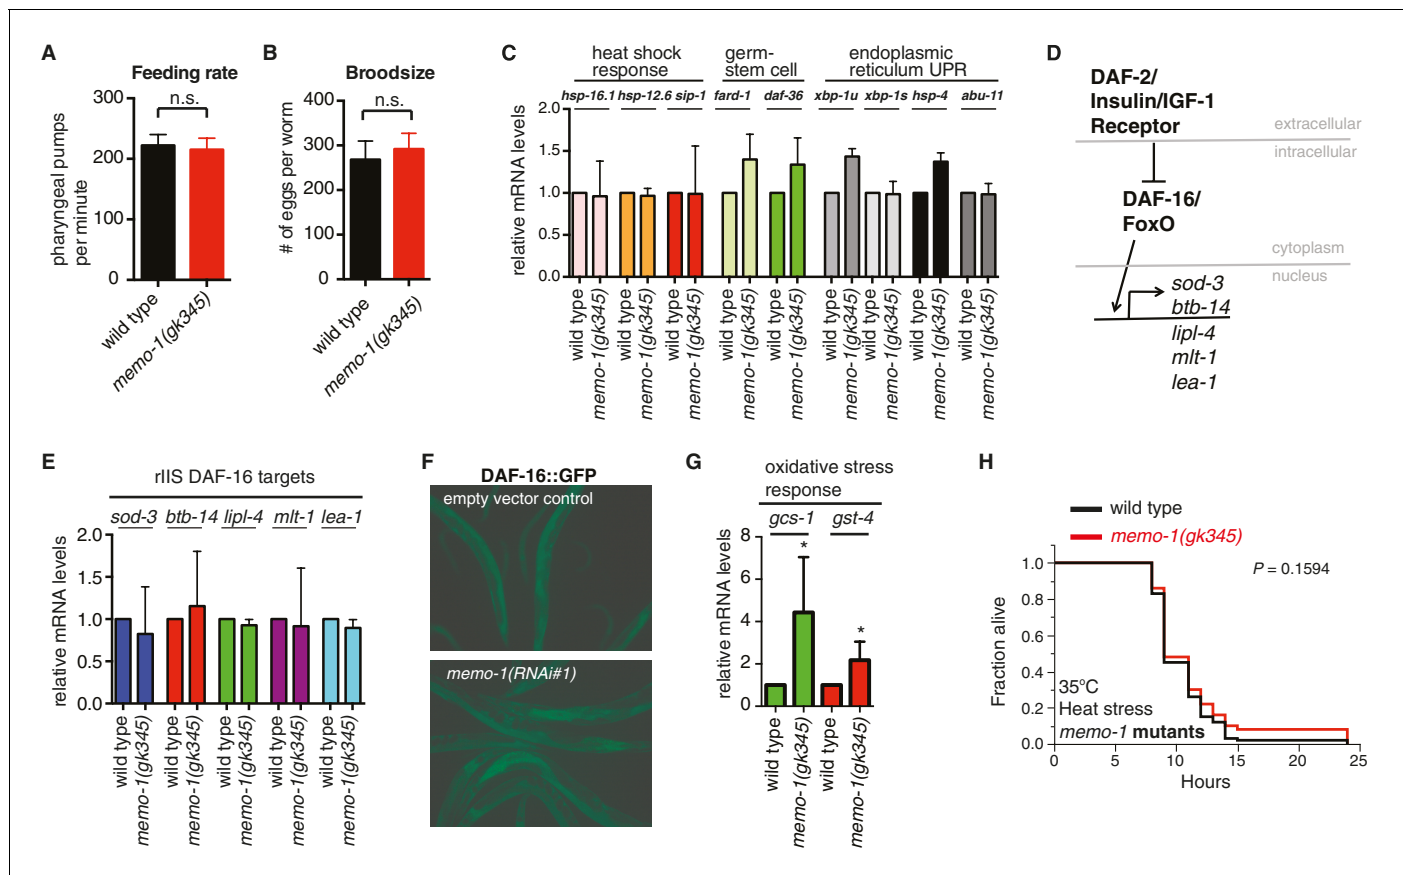

**Figure 1—figure supplement 3.** Reduced *memo-1* function induces oxidative stress gene expression. (A) Caloric restriction has been shown to extend lifespan in many species (Kenyon, 2010). Thus, we tested if the *memo-1(gk345)* mutants are calorically restricted. A genetic model for caloric restriction in the worm has an Eat phenotype, i.e., this worm has a pumping defect in its pharynx, preventing the animal from eating efficiently (Lakowski and Hekimi, 1998). Since P*memo-1::GFP* is expressed in the pharyngeal area (Figure 1A and Figure 1—figure supplement 1C and I), we analyzed *memo-1(gk345)* mutants for a pharyngeal pumping defect as a readout of feeding rate. *memo-1(gk345)* mutants did not have altered pharyngeal pumping compared to wild type (N2) at the L4 stage (N = 10 per strain, P value 0.8747 determined with t-test unpaired two-tailed). (B) Loss of *memo-1* does not affect progeny production. Brood size for wild type (N2) (268 ± 15) and for *memo-1(gk345)* mutants (292 ± 11) was not significantly different. Data represented as mean + s.e.m., P value = 0.1953 determined with t-test, unpaired, two-tailed. (C) Genes involved in the heat shock response, in the germ stem cell-less-mediated longevity (*glp-1*), and in the unfolded protein response (UPR) are not induced in *memo-1(gk345)* mutants, as determined by qRT-PCR for the indicated transcripts. N > 200 L4 animals, two merged independent trials in duplicates. *xbp-1u* = unspliced, *xbp-1s* = spliced. (D–F) Loss of *memo-1* does not affect insulin/IGF-1 signaling. (D) Schematic of insulin/IGF-1 receptor signaling to DAF-16/FOXO in *C. elegans*. Under normal conditions, insulin/IGF-1 receptor (*daf-2*) signaling retains the FOXO transcription factor DAF-16 in the cytoplasm. When insulin/IGF-1 signaling is reduced, DAF-16 translocates into the nucleus to initiate transcription of target genes (*sod-3*, *btb-14*, *lipl-4*, *mlt-1*, *lea-1*). (E) Downstream targets of DAF-16/Foxo transcription factor that are upregulated when insulin/IGF-1 receptor (*daf-2*) signaling is reduced (rIIS) are not altered in *memo-1(gk345)* mutant animals. (F) DAF-16::GFP translocates into the nucleus with *daf-2* knockdown (not shown), but not with *memo-1* knockdown (N > 60 per condition; *zls356* [DAF-16::GFP]). (G) *memo-1(gk345)* mutants have higher mRNA levels of oxidative stress response genes *gcs-1* and *gst-4* compared to wild type (N2), as determined by qRT-PCR. For each condition, two biological samples in duplicates of 200 L4 worms each were analyzed by qRT-PCR. All data are represented as mean ± s.e.m. P values of \* < 0.05 relative to wild type (N2) control, determined by one sample t-test, two-tailed, hypothetical mean of 1. (H) *memo-1* mutants are not heat stress resistant. Day one wild type (N2) and *memo-1(gk345)* mutants were placed at 35°C and scored every hour for survival (N = 100 per strain). There is no significant difference between wild type (N2) and *memo-1(gk345)* for heat stress survival determined with log-rank (Mantel-Cox) method to calculate P value = 0.1594.

DOI: 10.7554/eLife.19493.005



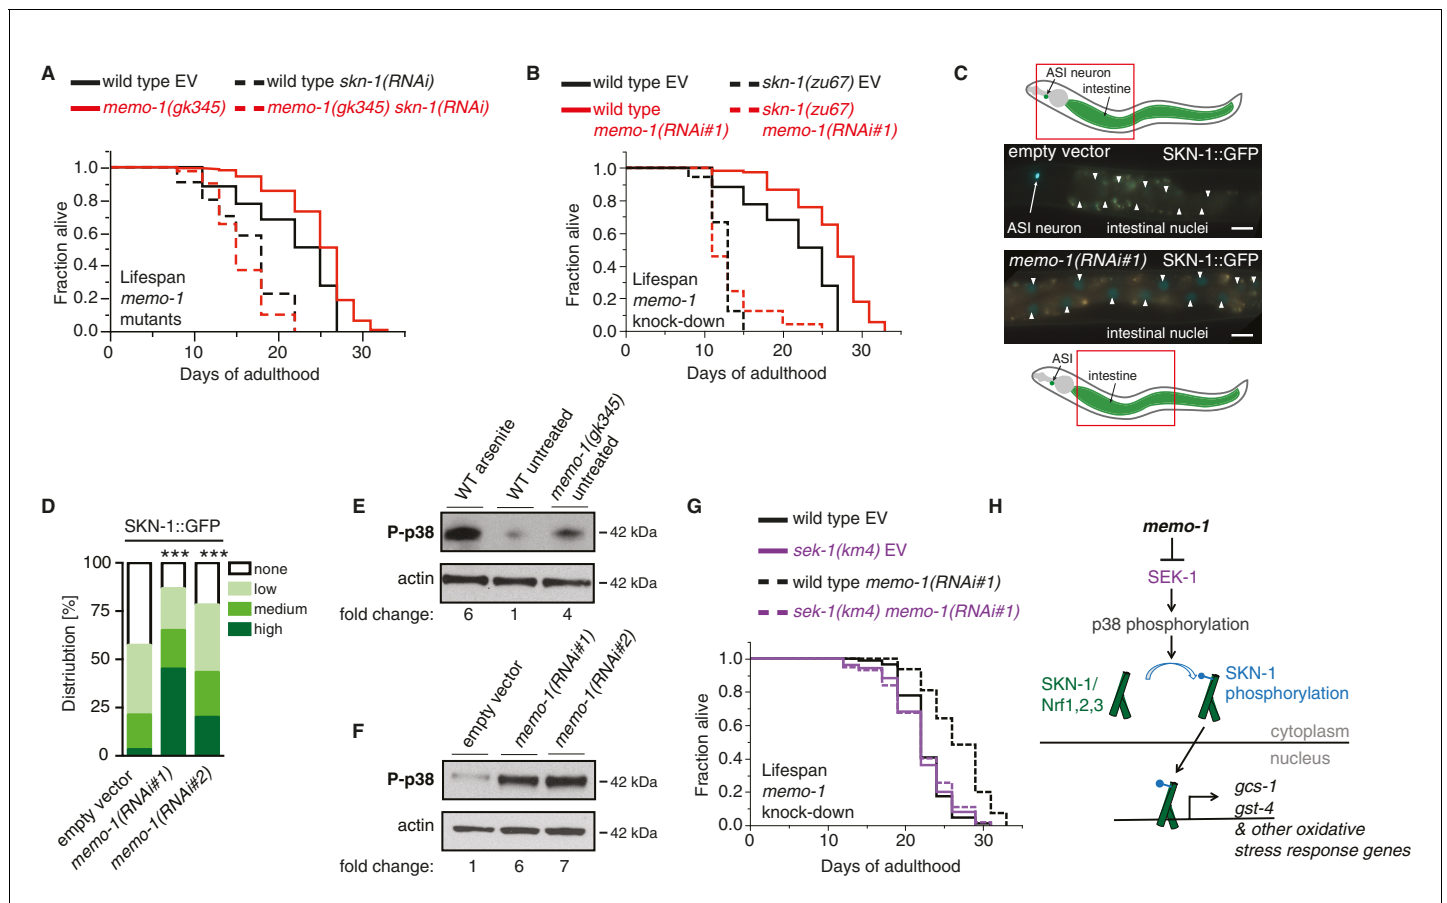

**Figure 2.** The oxidative stress response pathway is activated and is required for *memo-1(-)* mediated longevity and oxidative stress resistance. (A) Knockdown of *skn-1* starting on the first day of adulthood abolishes the increased lifespan of *memo-1(gk345)* mutants. For statistical details and additional lifespans see **Supplementary file 1**. (B) Knockdown of *memo-1(RNAi#1)* starting on the first day of adulthood increases lifespan of wild type (N2) animals, but failed to increase lifespan of *skn-1(zu67)* loss-of-function mutants. For statistical details and additional strains see **Supplementary file 1**. (C) Schematics and representative pictures of transgenic L4 animals expressing a translational fusion of SKN-1 protein tagged with GFP (*IdIs007* [SKN-1::GFP]), treated either with empty vector (upper picture; no SKN-1::GFP in intestine = score none) or *memo-1(RNAi#1)* (bottom picture; SKN-1::GFP in all intestinal nuclei = score high). Scale bar = 20  $\mu$ m. Triangles indicate intestinal nuclei. (D) Quantification of SKN-1::GFP in L4 transgenic animals: Knockdown of *memo-1(RNAi #1* or #2) starting from the egg stage induced translocation of SKN-1::GFP into the intestinal nuclei. N > 60, three merged trials. \*\*\* <0.0001 P values were determined by Chi<sup>2</sup> test. Scoring is described in Material and Methods. (E) p38 mitogen-activated protein kinase is phosphorylated (P-p38 MAPK) upon oxidative stress (WT arsenite; 5 mM sodium arsenite for 10 min) or in untreated *memo-1(gk345)* mutants, compared to untreated wild type (WT untreated). (F) Knockdown of *memo-1(RNAi #1* or #2) for two generations led to an increase p38 phosphorylation levels compared to empty RNAi vector control wild type animals. For (E–F) Total extracts from >1000 L4 animals in each condition were analyzed by western for levels of P-p38. Actin was used as a loading control. Fold change indicates the relative P-p38 MAPK to actin levels compared to control (E: WT untreated; F: WT empty RNAi vector control). (G) Knockdown of *memo-1(RNAi#1)* starting on the first day of adulthood increases lifespan of wild type (N2) animals, but failed to increase lifespan of *sek(km4)* loss-of-function mutants. For statistical details and additional trials see **Supplementary file 1**. (H) Schematic of the oxidative stress response pathway in *C. elegans*. Oxidative stress activates SEK-1/MAPKK phosphorylating p38 MAPK phosphorylating the SKN-1/Nrf transcription factor, promoting its nuclear translocation, which initiates transcription of oxidative stress response genes (e.g., *gcs-1* and *gst-4*).

DOI: 10.7554/eLife.19493.006

The following source data is available for figure 2:

**Source data 1.** Oxidative stress response genes upregulated by loss of *memo-1* are transcriptional targets of SKN-1.

DOI: 10.7554/eLife.19493.007

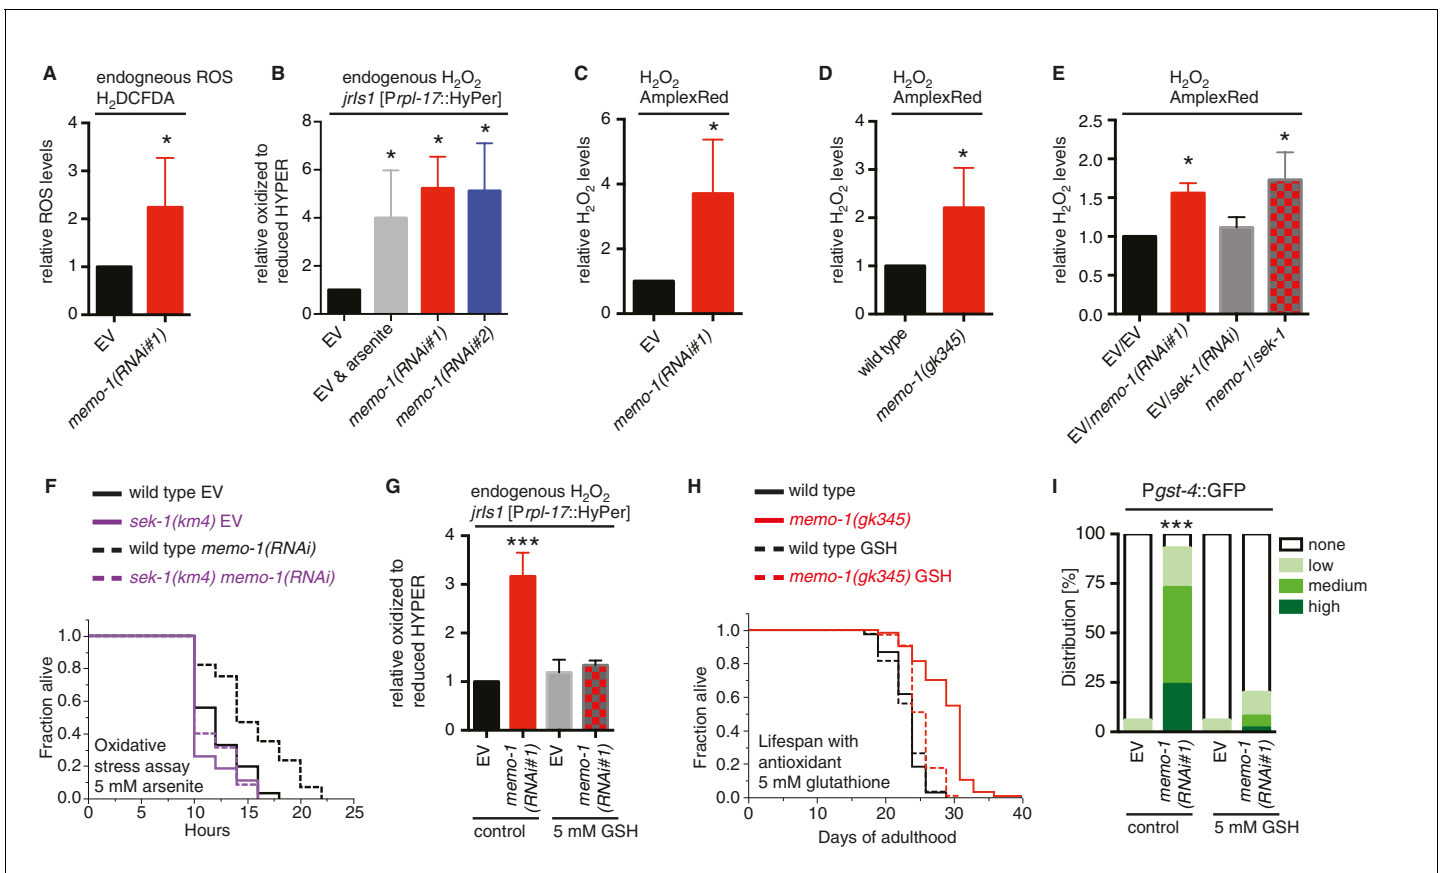

**Figure 3.** Increased ROS resulting from loss of *memo-1* function is required for longevity. (A) Knockdown of *memo-1* increases endogenous ROS levels *in vivo*, measured using the CM-H<sub>2</sub>DCFDA fluorescent molecular probe. (B) Knockdown of *memo-1* increases endogenous hydrogen peroxide levels, measured in transgenic HyPer worms (*jrls1*[*Prpl-17::HyPer*]), to a similar extent as measured in EV fed animals treated with 5 mM sodium arsenite for 10 min (EV and arsenite). (C–D) Knockdown of *memo-1* (C) and *memo-1(gk345)* mutants (D) have higher hydrogen peroxide levels *in vivo* compared to wild type (N2) control, as measured with AmplexRed. (E) Knockdown of *sek-1* does not suppress the higher hydrogen peroxide levels induced by *memo-1* (*RNAi*) measured with AmplexRed. (F) Loss of *sek-1* completely suppresses the *memo-1*(-) mediated oxidative stress resistance. For statistical details and additional trials see **Supplementary file 2**. (G) Treatment with the antioxidant glutathione (GSH) completely suppresses the higher endogenous hydrogen peroxide levels of transgenic HyPer worms (*jrls1*[*Prpl-17::HyPer*]) treated with *memo-1*(*RNAi*) or by measurement with Amplex Red (**Figure 3—figure supplement 1C**). Eggs were hatched on empty vector (EV) or *memo-1*(*RNAi*) food with 5 mM GSH or with solvent (H<sub>2</sub>O; control) and harvested for assay at larval stage 4 (L4). (H) The antioxidant glutathione (GSH) completely suppresses the longevity of *memo-1(gk345)* mutants. For statistical details and additional trials with *memo-1*(*RNAi*) see **Supplementary file 1**. (I) The antioxidant glutathione (GSH) completely suppresses the induction of oxidative stress response gene *gst-4* in response to *memo-1* knockdown. Transgenic animals *dvl19*[*Pgst-4::GFP*] were placed on empty vector (EV) or *memo-1*(*RNAi*) food with 5 mM GSH or solvent (H<sub>2</sub>O; control) for two generations and day one adults were scored. N > 60, three merged trials. \*\*\* <0.0001 *P* values were determined by Chi<sup>2</sup> test. Scoring is described in Material and methods. For (A–C, E) Eggs were hatched on empty vector (EV) or *memo-1*(*RNAi*) food and harvested for the assay at larval stage 4 (L4). For (A–E, G) N > 1000 for each condition, three merged trials. All data are represented as mean ± s.e.m. *P* values \* <0.05 relative to wild-type on EV or (D) to wild type (N2), determined by one sample t-test, two-tailed, hypothetical mean of 1.

DOI: 10.7554/eLife.19493.008

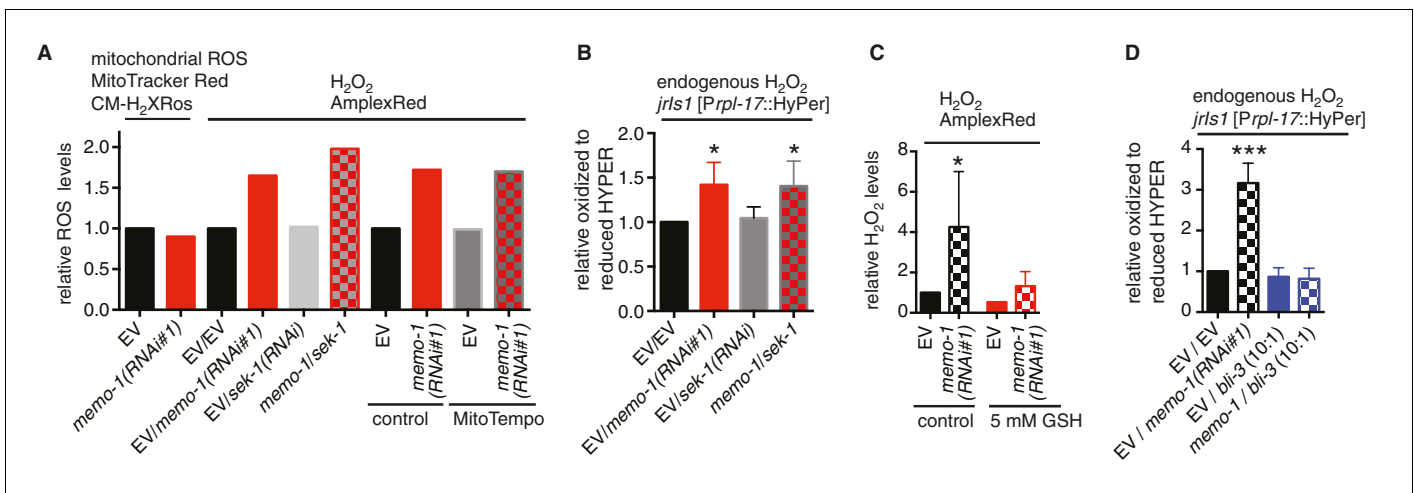

**Figure 3—figure supplement 1.** Reduced *memo-1* function induces NADPH oxidase specific ROS. (A) Knockdown of *memo-1* does not increase *in vivo* mitochondrial localized ROS levels as measured with MitoTracker Red CM-H<sub>2</sub>XRos fluorescent molecular probe. As a control, and run in parallel, *memo-1(RNAi)* was sufficient to increase hydrogen peroxide measured by Amplex Red, and this was not suppressed by *sek-1(RNAi)* or by treatment with the mitochondrial specific antioxidant MitoTempo. Eggs were hatched on empty vector (EV) or *memo-1(RNAi)* (or double RNAi with a ratio 1:1) food and harvested for the assay at larval stage 4 (L4). N > 1000 per condition in this single trial. (B) Knockdown of *sek-1* does not suppress the higher endogenous hydrogen peroxide levels of transgenic HyPer worms (*jrls1[Prpl-17::HyPer]*) treated with *memo-1(RNAi)*. (C) The antioxidant glutathione (GSH) completely suppresses the elevated hydrogen peroxide levels of wild-type animals treated with *memo-1(RNAi)*, as measured by Amplex Red. Eggs were hatched on empty vector (EV) or *memo-1(RNAi)* food in the presence of 5 mM GSH or solvent (control) and harvested for the assay at L4. (D) Knockdown of *bli-3/* NADPH oxidase completely suppresses the higher endogenous hydrogen peroxide levels of transgenic HyPer worms (*jrls1[Prpl-17::HyPer]*) treated with *memo-1(RNAi)*. A 1:10 ratio for the double RNAi treatment with *bli-3* was used. For (J–L) N > 1000 for each condition, three merged trials each with three replicates. All data are represented as mean ± s.e.m. P values \* <0.05 and \*\*\* <0.0001 relative to wild-type on EV were determined by one sample t-test, two-tailed, hypothetical mean of 1.

DOI: 10.7554/eLife.19493.009

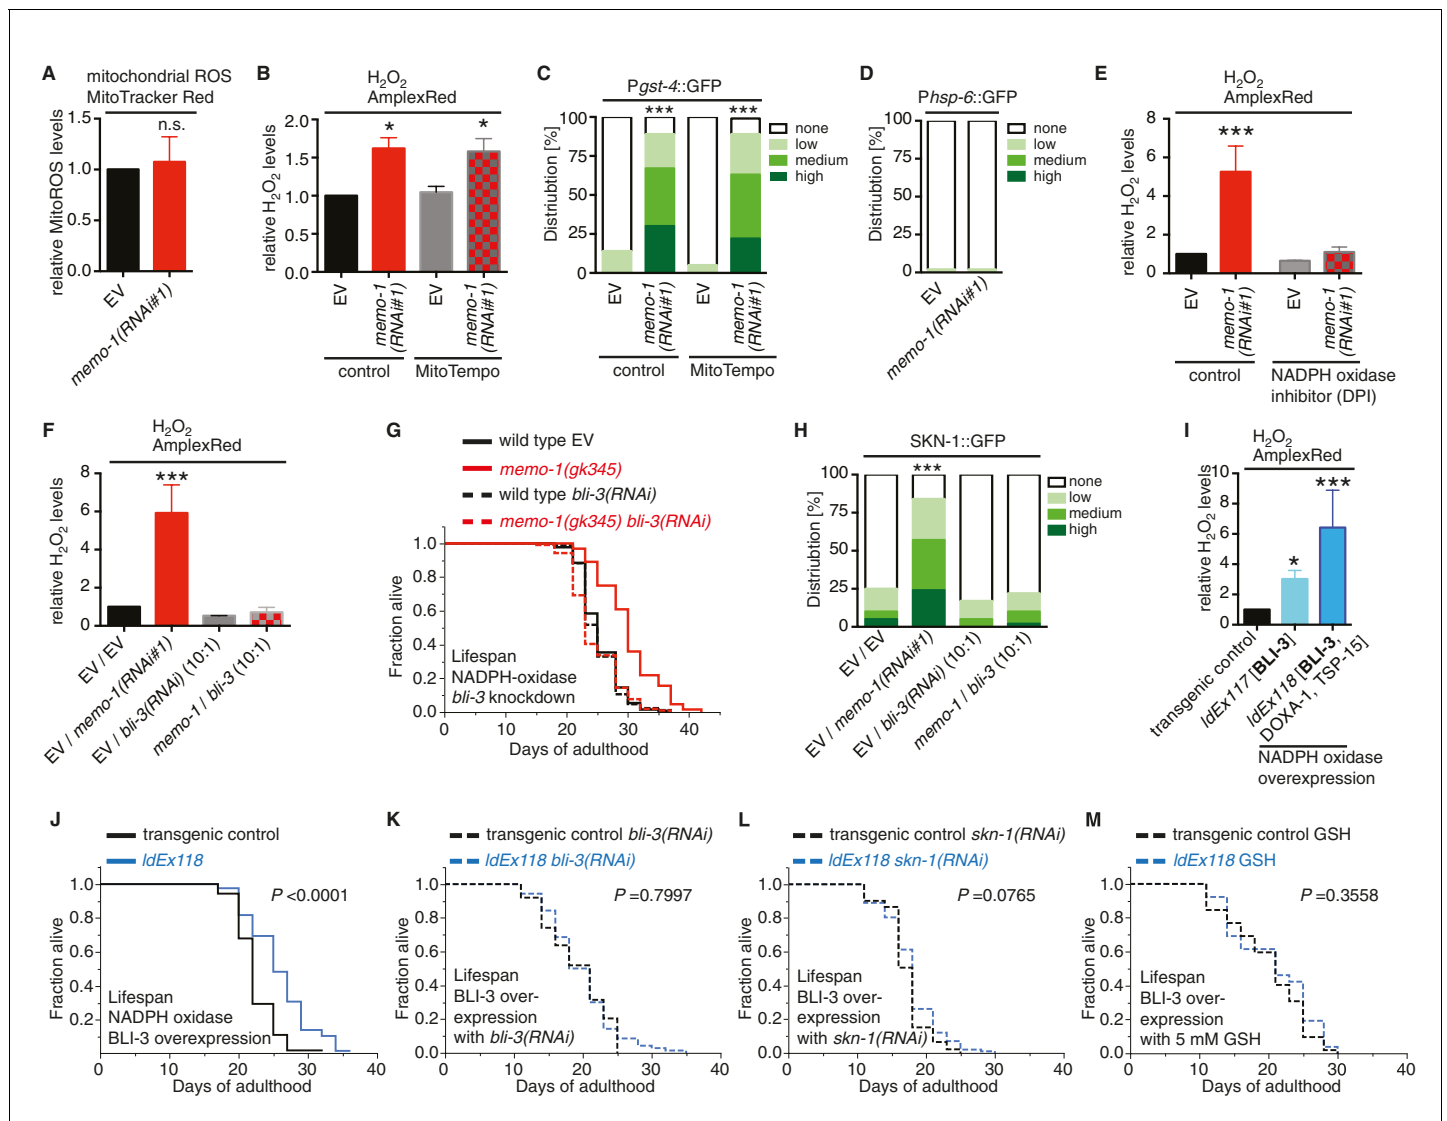

**Figure 4.** Loss of *memo-1* increases ROS via NADPH oxidase to extend lifespan. (A) Knockdown of *memo-1* does not increase mitochondrial localized ROS levels *in vivo*, measured with MitoTracker Red CM-H<sub>2</sub>XRos fluorescent molecular probe. In a parallel experiment, the same *memo-1(RNAi)* treatment was sufficient to increase hydrogen peroxide, as measured by Amplex Red (Figure 3—figure supplement 1A and Figure 4—figure supplement 1). (B) The mitochondrial specific antioxidant MitoTempo did not suppress *memo-1(RNAi)* induced ROS, measured with Amplex Red. (C) The mitochondrial specific antioxidant MitoTempo did not suppress *memo-1(RNAi)* induced expression of *gst-4* (*dvl319* [*Pgst-4::GFP*]).  $N > 60$ , three merged trials. \*\*\*  $< 0.0001$   $P$  values were determined by  $\chi^2$  test. Scoring is described in Material and methods. (D) The mitochondrial stress response gene *hsp-6* (*zcls13* [*Phsp-6::GFP*]) was not induced by *memo-1(RNAi)*.  $N > 100$  for each condition, three merged trials. As a control and run in parallel, *memo-1(RNAi)* was sufficient to increase *Pgst-4::GFP* expression (Figure 5—figure supplement 1B). (E) A short (15 min) treatment with the NADPH oxidase inhibitor Diphenyleneiodonium (DPI) completely suppressed the elevated hydrogen peroxide levels of wild-type worms treated with *memo-1(RNAi)*. (F) Knockdown of *bli-3*/ NADPH oxidase completely suppressed the elevated hydrogen peroxide levels of wild-type worms treated with *memo-1(RNAi)*. As reported in Chávez et al. (2009), a 1:10 ratio for the double RNAi treatment with *bli-3* was used because of the strong *bli-3* blistering phenotype. For corresponding experiments with transgenic HyPer worms (*jrls1*[*Prpl-17::HyPer*]), see Figure 3—figure supplement 1D. (G) Adulthood specific knockdown of *bli-3*/ NADPH oxidase (undiluted RNAi) completely suppressed the longevity of *memo-1(gk345)* mutants. For statistical details and additional trials see Supplementary file 1. (H) Knockdown of *bli-3*/ NADPH oxidase completely suppressed *memo-1(RNAi)* induced nuclear translocation of SKN-1 protein (*ldls007* [*SKN-1::GFP*]).  $N > 60$ , three merged trials. \*\*\*  $< 0.0001$   $P$  values were determined by  $\chi^2$  test. Scoring is described in Material and methods. (I) Transgenic worms overexpressing BLI-3 (*IdEx117*) alone, or triple transgenic worms (*IdEx118*) overexpressing BLI-3 and co-factors for NADPH oxidase complex maturation and stability (DOXA-1 and TSP-15; [Moribe et al., 2012]) showed an increased hydrogen peroxide level compared to control transgenic animals. Mixed stage worms,  $N > 1000$  for each condition, three merged trials. All data are represented as mean  $\pm$  s.e.m.  $P$  values \*  $< 0.05$  or \*\*\*  $< 0.0001$  relative to transgenic control (*IdEx102*) were determined by one sample t-test, two-tailed, hypothetical mean of 1. (J–M) Triple transgenic worms (*IdEx118*) overexpressing BLI-3, DOXA-1, TSP-15 showed an increased lifespan compared to transgenic

Figure 4 continued on next page

## Figure 4 continued

control (*IdEx102*). The increased lifespan was dependent on *bli-3* (K), *skn-1* (L), and ROS (M). (J–M) are from the same trial (**Supplementary file 1**). *P*-value determined by log-rank. Overexpression of BLI-3 alone (*IdEx117*) was also sufficient to increase lifespan (**Supplementary file 1**). For statistical details and additional trials see **Supplementary file 1**. For (A, B, E, F) eggs were hatched on empty vector (EV) or *memo-1*(RNAi) (or double RNAi with a ratio 1:1, except where indicated) food, and harvested for assay at larval stage 4 (L4). *N* > 1000 for each condition, three merged trials. All data are represented as mean ± s.e.m. *P* values \* <0.05 or \*\*\* <0.0001 relative to wild-type on EV were determined by one sample *t*-test, two-tailed, hypothetical mean of 1.

DOI: [10.7554/eLife.19493.010](https://doi.org/10.7554/eLife.19493.010)

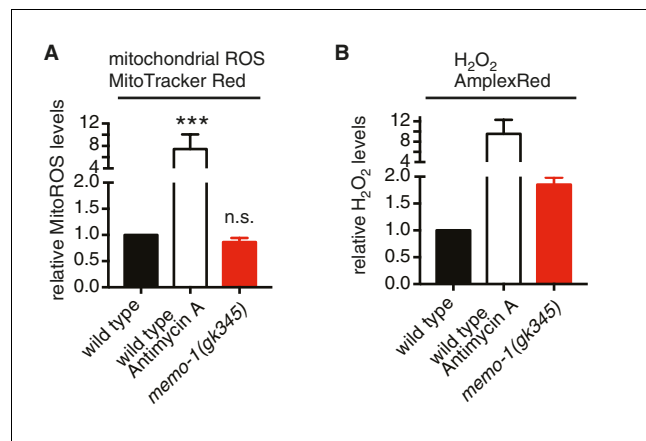

**Figure 4—figure supplement 1.** Loss of *memo-1* does not increase mitochondrial ROS. (A) Loss of *memo-1* does not increase *in vivo* mitochondrial localized ROS levels as measured with MitoTracker Red CM-H<sub>2</sub>XRos fluorescent molecular probe (five independent trials). To induce mitochondrial ROS, Antimycin A treatment on wild type was used as a control. (B) For two out of the five biological independent trials shown in (A), animal populations were split in half and the corresponding half was used to measure hydrogen peroxide in the supernatant with Amplex Red, in parallel to the mitochondrial ROS measurements with MitoTracker Red CMXRos. Mutants that lack *memo-1* showed an almost 2-fold increase in ROS measured with Amplex Red, but showed no significant difference in mitochondrial ROS compared to wild type measured with MitoTracker Red CM-H<sub>2</sub>XRos fluorescent molecular probe (A). For (A–B) N > 1000 per condition per trial. All data are represented as mean ± s.e.m. P values \*\*\* < 0.0001 relative to wild type were determined by one sample t-test, two-tailed, hypothetical mean of 1. Note that (B) are only two independent trials and therefore fail any statistical significance.

DOI: [10.7554/eLife.19493.011](https://doi.org/10.7554/eLife.19493.011)

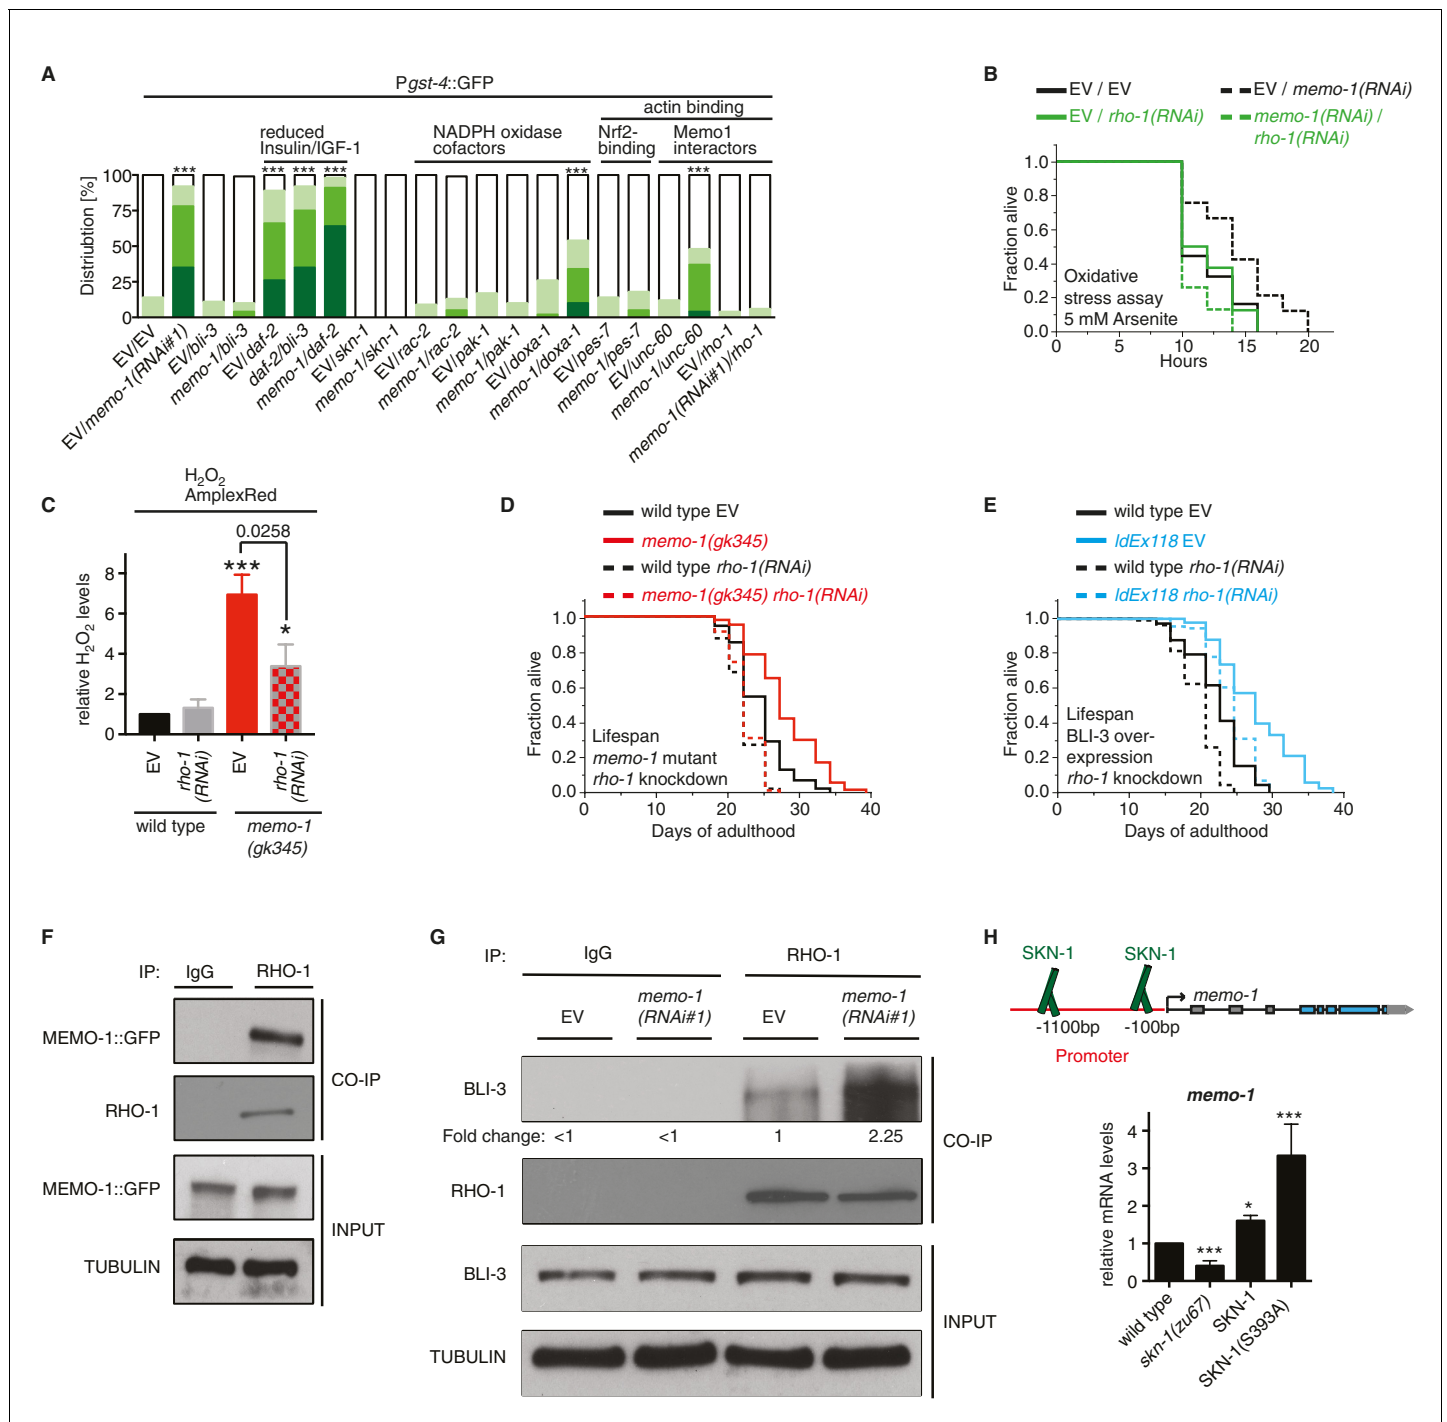

**Figure 5.** MEMO-1 inhibits NADPH oxidase via RHO-1/GTPase. (A) Summary of the targeted RNAi screen using the SKN-1 target gene *gst-4* expression (*dvl19* [*Pgst-4::GFP*]) as a read-out for *memo-1(-)* induced NADPH oxidase activity. N > 60, three merged trials. \*\*\* <0.0001 P values were determined by Chi<sup>2</sup> test. For individual trials see **Figure 5—figure supplement 1**. Scoring is described in Material and methods. (B) Loss of *rho-1* completely suppresses the *memo-1(-)* mediated oxidative stress resistance. For statistical details see **Supplementary file 2**. (C) Knockdown of *rho-1* lowered the *memo-1(-)* mediated ROS induction in all three independent biological trials. Eggs were hatched on empty vector (EV) or *rho-1*(RNAi). All data are represented as mean ± s.e.m. P values \* <0.05 and \*\*\* <0.0001 relative to wild type EV control were determined by one sample t-test, two-tailed, hypothetical mean of 1. The *memo-1(gk345)* mutants treated with *rho-1*(RNAi) was compared to the *memo-1(gk345)* mutants treated with EV using paired t-test, one-tailed. (D) The longevity of *memo-1(gk345)* mutants was completely suppressed by adulthood specific knockdown of *rho-1*. For statistical details see **Supplementary file 1**. (E) The longevity of triple transgenic worms (*ldEx118*) overexpressing BLI-3, DOXA-1, TSP-15 was partially suppressed by adulthood specific knockdown of *rho-1*. For statistical details see **Supplementary file 1**. (F) MEMO-1 physically interacts with RHO-1 **Figure 5 continued on next page**

## Figure 5 continued

under wild-type conditions. Lysates from MEMO-1::GFP expressing animals *ldEx112* [MEMOofosmid::GFP] were subjected to immunoprecipitations with a *C. elegans* specific RHO-1 antiserum and immunoblotted with a GFP antibody following SDS-PAGE. (G) Knockdown of *memo-1* enhances the physical interaction of RHO-1 with BLI-3. Endogenous RHO-1 was immunoprecipitated from lysates of wild type worms fed either EV or *memo-1*(RNAi) using RHO-1 antibody and was immunoblotted with BLI-3 antiserum. The relative BLI-3 levels in Co-IP samples to input samples is expressed as a fold change of *memo-1*(RNAi) to the empty vector control (EV). (H) Feedback loop: The *memo-1* promoter contains four predicted SKN-1 binding sites (wormbase.org). In a genome-wide screen, transgenic SKN-1::GFP showed a high signal on two *skn-1*-binding sites in the *memo-1* promoter region (upper panel; [Niu et al., 2011]). Lower panel shows that the *memo-1* mRNA levels are lower in *skn-1*(*zu67*) loss-of-function mutants and higher in conditions of SKN-1 overexpression (*ldIs007* [SKN-1::GFP]) and constitutively nuclear SKN-1 overexpression (*ldIs020* [SKN-1S393::GFP]; [Tullet et al., 2008]) in transgenic animals, compared to wild type (N2), determined by qRT-PCR. Three biological samples of each 100 L4 worms per strain per trial. Data are represented as mean  $\pm$  s.e.m. *P* value \* <0.05, \*\* <0.001, \*\*\* <0.0001 relative to wild type or control, by one sample *t*-test, two-tailed, hypothetical mean of 1.

DOI: [10.7554/eLife.19493.012](https://doi.org/10.7554/eLife.19493.012)



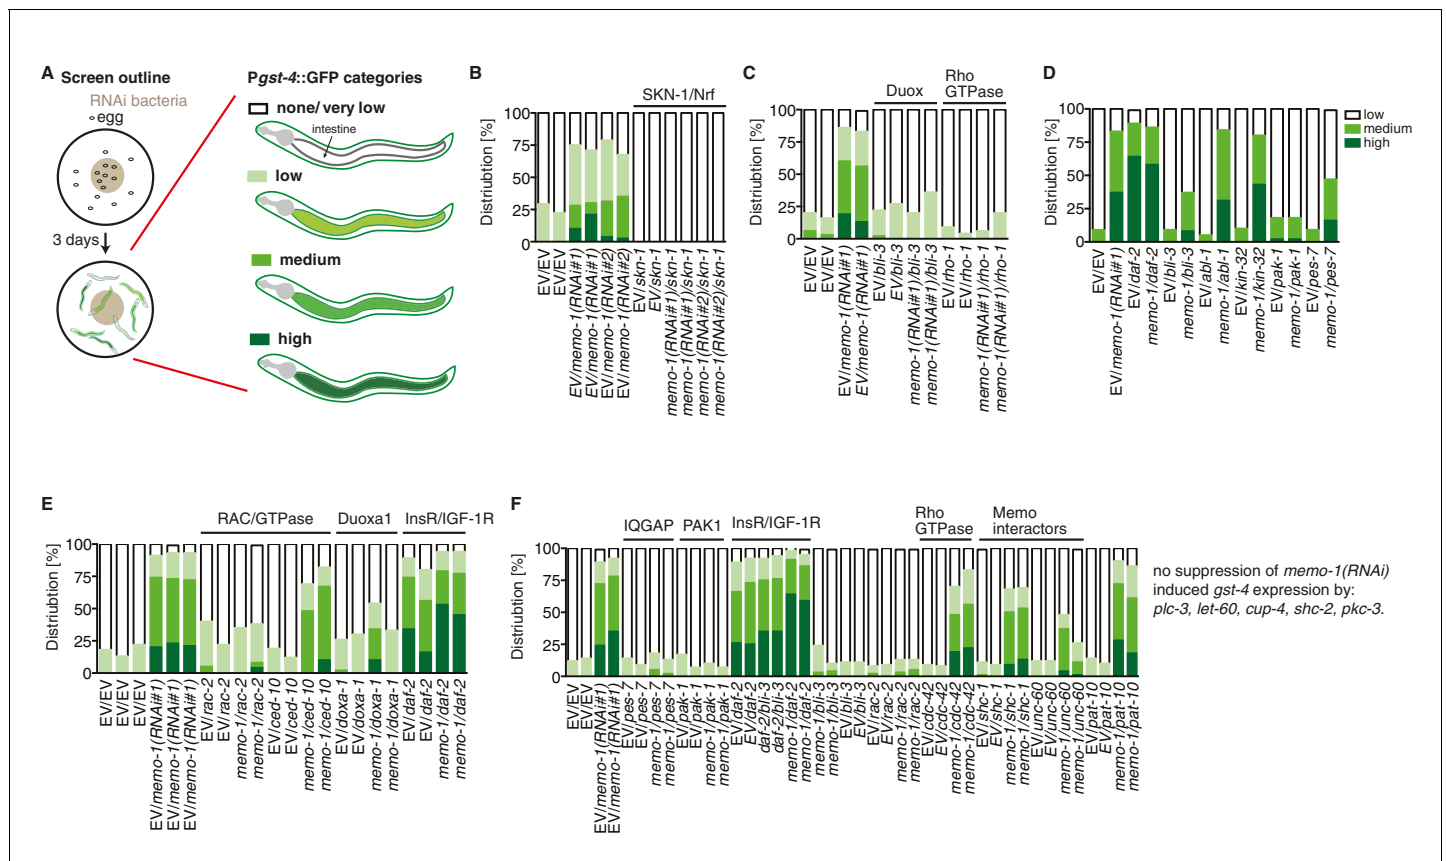

**Figure 5—figure supplement 1.** Targeted RNAi screen to discover genes mediating *memo-1* activation of SKN-1. (A) Schematic outline of the targeted RNAi screen. Eggs were placed on RNAi food and early adults (left panel) were scored for their *gst-4* (*dvl519* [*Pgst-4::GFP*]) induction in the intestine (right panel). Scoring is described in Material and methods. We screened more than 200 genes; the positive hits were retested and results are represented in the graphs. For (B–F): each graph shows 1 trial with 2–3 replicates with  $N > 60$  for each condition and replicate. RNAi clones were sequenced to confirm their identity. Mammalian homologues or the gene family are indicated. (B) *skn-1*(RNAi) completely abolishes *gst-4* expression. (C) The dual oxidase (Duox) BLI-3 and RHO-1 (Rho GTPase), but not CDC-42 (Rho GTPase; see F) are required for *memo-1*(RNAi) induced *gst-4* expression. (D) The p21-activated kinase PAK-1 is required for *memo-1*(RNAi) induced *gst-4* expression. (E) The Duoxa1 (Duox maturation factor) *doxa-1*, *rac-2* (RAC/GTPase), but not *ced-10* (RAC/GTPase) are required for *memo-1*(RNAi) induced *gst-4* expression. Reducing *daf-2*/insulin/IGF-1 receptor (InsR/IGF-1R) signaling induces *gst-4* expression and this is additive to *memo-1*(RNAi) induced *gst-4* expression. (F) *pes-7*/IQGAP is completely and *unc-60*/cofilin is partially required for *memo-1*(RNAi) induced *gst-4* expression. Importantly, *bli-3*(RNAi) does not block *gst-4* expression *per se*, since *daf-2*(RNAi)-mediated *gst-4* expression was still occurring even when *bli-3* was knocked down. Several potential interesting candidates were not required for *memo-1*(RNAi) induced *gst-4* expression, including *shc-1*, *shc-2*, *plc-3*, *let-60*, *cup-4*, *pkc-3*.

DOI: 10.7554/eLife.19493.013

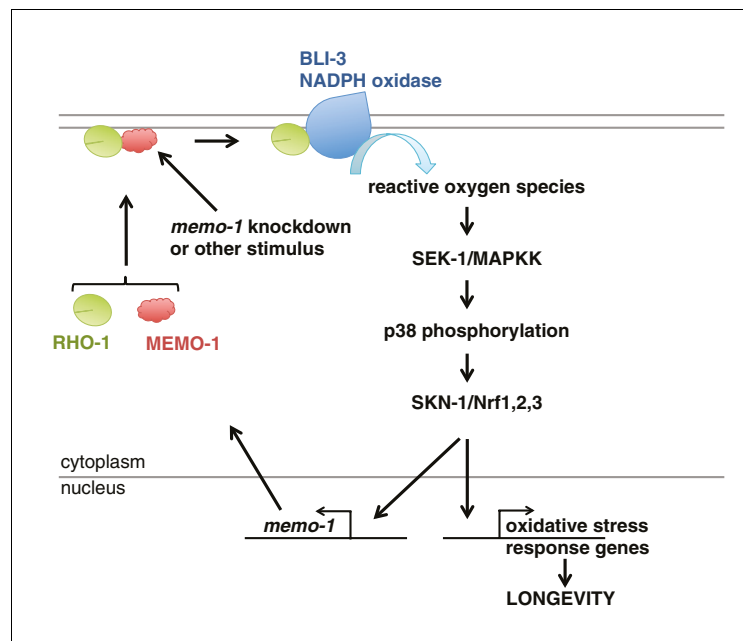

**Figure 6.** Model of how MEMO-1 activates NADPH oxidase activity to promote oxidative stress resistance and longevity. Under normal conditions, MEMO-1 is complexed with RHO-1/GTPase. Loss of *memo-1* frees RHO-1 to enhance BLI-3/NADPH oxidase activity to generate localized ROS, which activates p38 MAPK signaling to SKN-1 to transcribe genes important for oxidative stress resistance and longevity. Similar to ERBB2 recruiting Memo1 in breast cancer cells (Marone et al., 2004), we speculate that in *C. elegans* a stimulus might activate a cell-surface receptor to recruit MEMO-1, thereby freeing RHO-1 to promote BLI-3/NADPH oxidase activity. Because SKN-1 also transcribes *memo-1* (Figure 5H) resulting in a negative feedback loop to shut off BLI-3/NADPH oxidase activity, *memo-1* RNAi or mutation breaks this feedback loop, resulting in continuously enhanced BLI-3 activity. DOI: 10.7554/eLife.19493.014
